# Supplementary material for: Effect of kettlebell training on bone mineral density in two older adults with osteoporosis: a multiple-case study from the BELL trial
Source: bioRxiv or medRxiv preprint supplement (doi:10.1101/2021.08.15.21261771), 2021-11-08
Supplement: Supplementary file [file media-1.pdf]

# Effect of kettlebell training on bone mineral density in two older adults with osteoporosis: a multiple-case study from the BELL trial.

Australian New Zealand Clinical Trials Registry (ID: [ACTRN12619001177145](https://www.anzctr.org.au/Trial/Registration/TrialRegistration.aspx?ACTRN12619001177145)).

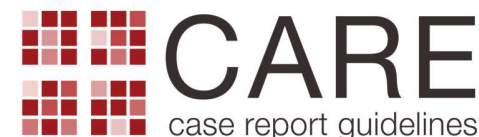

## CARE (CAsE REport) guidelines

| Item name                | Item | Brief description                                                                                                                                                                                                                                                                                                                                       | Addressed on page number/ heading |
|--------------------------|------|---------------------------------------------------------------------------------------------------------------------------------------------------------------------------------------------------------------------------------------------------------------------------------------------------------------------------------------------------------|-----------------------------------|
| Title                    | 1    | The words “case report” (or “case study”) should appear in the title along with phenomenon of greatest interest (e.g., symptom, diagnosis, test, intervention)                                                                                                                                                                                          | p1                                |
| Key words                | 2    | The key elements of this case in 2-5 words                                                                                                                                                                                                                                                                                                              | p1                                |
| Abstract                 | 3    | a) Introduction - What does this case add?<br>b) Case Presentation: <ul style="list-style-type: none"> <li>The main symptoms of the patient</li> <li>The main clinical findings</li> <li>The main diagnoses and interventions</li> <li>The main outcomes</li> </ul> c) Conclusion - What were the main “take-away” lessons from this case?              | p1                                |
| Introduction             | 4    | Brief background summary of this case referencing the relevant medical literature                                                                                                                                                                                                                                                                       | p1-2                              |
| Participant information  | 5    | a) Demographic information (e.g., age, gender, ethnicity, occupation)<br>b) Main symptoms of the patient (his or her chief complaints)<br>c) Medical, family, and psychosocial history - including diet, lifestyle, and genetic information whenever possible, and details about relevant comorbidities including past interventions and their outcomes | p2<br>n/a<br>p2                   |
| Clinical findings        | 6    | Describe the relevant physical examination (PE) findings                                                                                                                                                                                                                                                                                                | p5                                |
| Timeline                 | 7    | Depict important dates and times in this case (table or figure)                                                                                                                                                                                                                                                                                         | p4-5                              |
| Diagnostic assessment    | 8    | a) Diagnostic methods (e.g., PE, laboratory testing, imaging, questionnaires)<br>b) Diagnostic challenges (e.g., financial, language/cultural)<br>c) Diagnostic reasoning including other diagnoses considered<br>d) Prognostic characteristics (e.g., staging) where applicable                                                                        | p5<br>n/a<br>n/a<br>n/a           |
| Therapeutic intervention | 9    | a) Types of intervention (e.g., pharmacologic, surgical, preventive, self-care) <ul style="list-style-type: none"> <li>Administration of intervention (e.g., dosage, strength, duration)</li> <li>Changes in intervention (with rationale)</li> </ul>                                                                                                   | p3-4                              |
| Follow-up and outcomes   | 10   | a) Summarize the clinical course of all follow-up visits including <ul style="list-style-type: none"> <li>Clinician and patient-assessed outcomes</li> <li>Important follow-up test results (positive or negative)</li> <li>Intervention adherence and tolerability (and how this was assessed)</li> <li>Adverse and unanticipated events</li> </ul>    | p5                                |

| Item name               | Item | Brief description                                                                                                                                                                                                                         | Addressed on page number/ heading |
|-------------------------|------|-------------------------------------------------------------------------------------------------------------------------------------------------------------------------------------------------------------------------------------------|-----------------------------------|
| Discussion              | 11   | a) The strengths and limitations of the management of this case<br>b) The relevant medical literature<br>c) The rationale for conclusions (including assessments of cause and effect) d) The main “take-away” lessons of this case report | p8<br>p6-8<br>p7-8                |
| Participant perspective | 12   | The patient should share his or her perspective or experience whenever possible                                                                                                                                                           | n/a                               |
| Informed consent        | 13   | Did the patient give informed consent? Please provide if requested                                                                                                                                                                        | Yes, p2                           |

Gagnier, Joel J., et al. "The CARE guidelines: consensus-based clinical case report guideline development." *Journal of clinical epidemiology* 67.1 (2014): 46-51.
